# Supplementary material for: A curated collection of Klebsiella metabolic models reveals variable substrate usage and gene essentiality
Source: Genome Res. 2022 May;32(5):1004–14. doi: 10.1101/gr.276289.121 (PMC9104693; doi:10.1101/gr.276289.121)
Supplement: Supplemental Material [file supp_gr.276289.121_Supplemental_Table_S1.xlsx]

## Sheet: Sheet1
Supplemental Table 1: Strain collection in this study. Genome information, model information
Strain Name	Strain Bank ID	Species	ST	Ecological group	Host	Source or infection	Country	Year	Genome size	Chromosome size	Num plasmids	Num CDS	Num Model Genes	prop_genes	Num Model Reactions	Model Accuracy	Model MCC	Model TP	Model TN	Model FP	Model FN	Genome accession	Sequencing method	Biosample accession	virulence_score	resistance_score	num_resistance_classes	num_resistance_genes	Yersiniabactin	YbST	Colibactin	CbST	Aerobactin	AbST	Salmochelin	SmST	RmpADC	RmST	rmpA2	wzi	K_locus	K_locus_problems	K_locus_confidence	K_locus_identity	K_locus_missing_genes	O_locus	O_type	O_locus_problems	O_locus_confidence
200023T	SB5857	K. africana	ST3291	Carriage	Human	Feces	Senegal	2016	5443802	5243981	1	5021	1215	24.2	2283	95.7	0.84	79	11	4	0	CP084874-75	Illumina + ONT	SAMN22024779	0	0	0	0	-	0	-	0	-	0	-	0	-	0	-	-	KL27	none	Very high	0.9537		O2v1	O2	*	Very high
03-9138-2	SB3332	K. pneumoniae	ST65	Community acquired	Human	Anal abscess	Martinique	2003	5157573	5157573	0	4802	1219	25.39	2294	94.7	0.82	76	13	5	0	CP084873	PacBio	SAMN22024780	0	0	0	0	-	0	-	0	-	0	-	0	-	0	-	wzi157	KL2	none	Very high	0.984		O1v2	O1	-	High
04A025	SB20	K. pneumoniae	ST15	Hospital acquired	Human	Blood	France	1997	5504965	5351706	1	5105	1215	23.8	2292	94.7	0.8	77	12	4	1	CP084871-72	Illumina + ONT	SAMN22024781	1	0	5	5	ybt 10; ICEKp4	107-2LV	-	0	-	0	-	0	-	0	-	wzi24	KL24	none	Very high	0.9998		O1v1	O1	none	Very high
BJ1	SB4496	K. pneumoniae	ST380/CG380	Community acquired	Human	Liver abscess	France	2011	5258072	5258072	0	4821	1222	25.35	2296	95.7	0.85	77	13	4	0	CP084870	Illumina + ONT	SAMN22024782	2	0	0	0	ybt 12; ICEKp10	1	clb 1	1	-	0	-	0	-	0	-	wzi2	KL2	none	Very high	0.9974		O1v1	O1	none	Very high
CG43	SB4454	K. pneumoniae	ST86/CG86	Community acquired	Human	Liver abscess	Taiwan	unknown	5386242	5166857	1	5005	1215	24.28	2292	95.7	0.84	78	12	3	1	NC_022566;NC_005249	public genome	SAMN02603668	3	0	0	0	-	0	-	0	iuc 1	1	iro 1	1	rmp 1; KpVP-1	26-2LV	rmpA2_1	wzi2	KL2	-	None	0.9989	KL2_05_wzb,KL2_07,KL2_08,KL2_11_wzx,KL2_12	O1v1	O1	none	Very high
CIP 52.145	SB3341	K. pneumoniae	ST66	Community acquired	Human		Indonesia	before 1935	5655684	5438894	2	5312	1222	23	2296	88.3	0.67	71	12	11	0	FO834904-06	public genome	SAMEA3283117	5	0	0	0	ybt 12; ICEKp10	315	clb 1	9	iuc 2	24	iro 2	22	rmp 2; KpVP-2	2	-	wzi4	KL2	-	High	0.9833	KL2_13	O1v2	O1	none	Very high
KP13	SB4938	K. pneumoniae	ST442	Hospital acquired	Human	Blood	Brazil	2009	5307003	5307003	0	4918	1219	24.79	2294	96.8	0.88	78	13	3	0	CP003999	public genome	SAMN02641520	1	0	2	0	ybt 0; ICEKp5	223	-	0	-	0	-	0	-	0	-	wzi154	KL107	none	Very high	0.9998		O2v2	O2	none	Very high
MGH 78578	SB107	K. pneumoniae	ST38	Hospital acquired	Human	Sputum	USA	1994	5694894	5315120	5	5332	1243	23.31	2305	95.7	0.82	80	10	4	0	NC_009648-53	public genome	SAMN02603941	0	1	7	14	-	0	-	0	-	0	-	0	-	0	-	wzi50	KL52	none	Perfect	1		OL101	OL101	*	High
NJST258-1	SB4975	K. pneumoniae	ST258/CG258	Hospital acquired	Human	Urinary tract	USA	2010	5540936	5263229	5	5261	1219	23.17	2289	92.6	0.7	78	9	6	1	NZ_CP006923-928	public genome	SAMN03081502	0	2	6	12	-	0	-	0	-	0	-	0	-	0	-	wzi154	KL107	none	Very high	0.9998		O2v2	O2	none	Very high
NTUH K2044	SB3928	K. pneumoniae	ST23/CG23	Community acquired	Human	Liver abscess	Taiwan	unknown	5472672	5248520	1	5062	1225	24.2	2296	96.8	0.87	80	11	3	0	NC_012731;NC_006625	public genome	SAMD00060934	4	0	0	0	ybt 2; ICEKp1	326	-	0	iuc 1	1	iro 1,iro 3	19,18	rmp 3; ICEKp1,rmp 1; KpVP-1	30-1LV,26	rmpA2_3-47%	wzi1	KL1	none	Perfect	1		O1v2	O1	none	Very high
SA1	SB4021	K. pneumoniae	ST86/CG86	Hospital acquired	Human	Blood/pneumoniae	France	2008	5563569	5324320	1	5174	1215	23.48	2292	96.8	0.86	80	11	1	2	CP084868-69	PacBio	SAMN22024789	4	0	0	0	ybt 0; ICEKp12	13	-	0	iuc 1	1	iro 1	1	rmp 1; KpVP-1	26	rmpA2_4-34%	wzi2	KL2	none	Very high	0.9994		O1v1	O1	none	Very high
SA12	SB4385	K. pneumoniae	ST23/CG23	Community acquired	Human	Liver abscess	France	2008	5661819	5431677	1	5250	1226	23.35	2298	96.8	0.87	80	11	3	0	CP084866-67	Illumina + ONT	SAMN22024790	5	0	0	0	ybt 1; ICEKp10	337	clb 2	29	iuc 1	1	iro 1,iro 1	2,2	rmp 1; KpVP-1,rmp 1; KpVP-1	26,26	rmpA2_6*-60%	wzi1	KL1	none	Very high	0.9998		O1v2	O1	none	Very high
SB1067	SB1067	K. pneumoniae	ST17	Carriage	Human	Feces	Netherlands	2002	5510448	5211784	5	5166	1219	23.6	2295	95.7	0.86	76	14	4	0	CP084860-65	Illumina + ONT	SAMN22024791	0	0	0	0	-	0	-	0	-	0	-	0	-	0	-	wzi186	KL2	none	Very high	0.9872		O2v2	O2	none	Very high
SB1139	SB1139	K. pneumoniae	ST37	Carriage	Human	Feces	Netherlands	2002	5385248	5385248	0	5011	1225	24.45	2297	94.7	0.8	78	11	5	0	CP084859	Illumina + ONT	SAMN22024792	1	0	0	0	ybt 9; ICEKp3	209-4LV	-	0	-	0	-	0	-	0	-	wzi8	KL8	none	Very high	0.9985		O2v2	O2	none	Very high
SB1170	SB1170	K. pneumoniae	ST45	Carriage	Human	Feces	Netherlands	2002	5644528	5472677	2	5263	1223	23.24	2297	96.7	0.86	78	11	2	1	CP084856-58	Illumina + ONT	SAMN22024793	1	0	0	0	ybt 10; ICEKp4	78	-	0	-	0	-	0	-	0	-	wzi101	KL24	none	Very high	0.9902		O2v1	O2	none	Very high
SB2390 (=cur15505)	SB2390	K. pneumoniae	ST14	Hospital acquired	Human	Urinary tract	Curacao	2002	5697330	5346560	3	5325	1214	22.8	2292	92.6	0.77	74	13	7	0	CP084852-55	Illumina + ONT	SAMN22024794	1	1	6	10	ybt 10; ICEKp4	106	-	0	-	0	-	0	-	0	-	wzi2	KL2	none	Very high	0.9975		O1v1	O1	none	Very high
SB611	SB611	K. pneumoniae	ST63	Environment	Water		Netherlands	2000	5788054	5336167	8	5463	1202	22	2288	93.6	0.78	75	13	5	1	CP084843-51	Illumina + ONT	SAMN22024795	0	0	0	0	-	0	-	0	-	0	-	0	-	0	-	-	KL111	none	Very high	0.9952		OL103	OL103	-	None
SB612	SB612	K. pneumoniae	ST50	Environment	Water		Netherlands	2000	5908231	5324939	12	5561	1211	21.78	2291	93.6	0.77	76	12	5	1	CP084830-42	Illumina + ONT	SAMN22024796	0	0	0	0	-	0	-	0	-	0	-	0	-	0	-	wzi180	KL116	-	High	0.9997	KL116_14_wzy,KL116_17_wcpG	O1v1	O1	none	Very high
SB615	SB615	K. pneumoniae	ST62	Environment	Water		Netherlands	2000	5180404	5180404	0	4789	1223	25.54	2297	94.7	0.83	75	14	5	0	CP084829	Illumina + ONT	SAMN22024797	0	0	0	0	-	0	-	0	-	0	-	0	-	0	-	wzi447	KL124	-	Good	0.9672	KL124_17_wclK	OL101	OL101	-	High
SB617	SB617	K. pneumoniae	ST55	Environment	Water		Netherlands	2000	5429624	5301905	3	5063	1229	24.27	2299	95.7	0.82	79	11	3	1	CP084825-28	Illumina + ONT	SAMN22024798	0	0	0	0	-	0	-	0	-	0	-	0	-	0	-	wzi447	KL124	-	Good	0.9671	KL124_17_wclK	OL101	OL101	*	High
T69	SB4536	K. pneumoniae	ST375/CG375	Community acquired	Human	Liver abscess	France	2010	5564218	5357592	1	5171	1222	23.63	2295	95.7	0.85	77	13	4	0	CP084823-24	PacBio	SAMN22024799	4	0	0	0	ybt 5; ICEKp6?	12	-	0	iuc 1	20	iro 1	14	rmp 1; KpVP-1	26	rmpA2_5-54%	wzi72	KL2	none	Very high	0.9839		O1v2	O1	none	Very high
01A030T	SB11	K. quasipneumoniae subsp quasipneumoniae	ST1528	Hospital acquired	Human	Blood	Austria	1997	5869016	5343479	1	5091	1203	23.63	2285	95.7	0.85	76	14	3	1	CP084876-77	PacBio	SAMN22024800	0	0	2	2	-	0	-	0	-	0	-	0	-	0	-	wzi15	KL35	*	Very high	0.953		O3/O3a	O3/O3a	none	Very high
18A069	SB59	K. quasipneumoniae subsp quasipneumoniae	ST1118	Hospital acquired	Human	Blood	Spain	1997	5507945	5315931	4	5171	1198	23.17	2284	95.7	0.86	75	15	3	1	CP084818-22	Illumina + ONT	SAMN22024801	0	0	2	2	-	0	-	0	-	0	-	0	-	0	-	wzi165	KL10	*	Very high	0.9516		O3/O3a	O3/O3a	none	Very high
SB1124	SB1124	K. quasipneumoniae subsp quasipneumoniae	ST2274	Environment	Water (environment)		Netherlands	2002	5818970	5117462	11	5521	1197	21.68	2283	92.6	0.77	72	15	5	2	CP084806-17	Illumina + ONT	SAMN22024802	0	0	0	0	-	0	-	0	-	0	-	0	-	0	-	wzi371	KL138	-	High	0.9993	KL138_14_wzx	OL102	OL102	-*	None
SB98	SB98	K. quasipneumoniae subsp quasipneumoniae	ST622	Environment	Environment		unknown	unknown	5944214	5416099	2	5495	1198	21.8	2283	96.8	0.88	77	14	2	1	CP084803-05	Illumina + ONT	SAMN22024803	0	0	0	0	-	0	-	0	-	0	-	0	-	0	-	-	KL125	*	High	0.9027		O3/O3a	O3/O3a	*	Very high
U41	SB2110	K. quasipneumoniae subsp quasipneumoniae	ST526	Environment	Environment		Germany	1990	6009817	5456874	13	5667	1209	21.33	2289	94.7	0.81	76	13	3	2	CP084789-802	Illumina + ONT	SAMN22024804	0	0	3	2	-	0	-	0	-	0	-	0	-	0	-	wzi84	KL72	-+*	Low	0.9565	KL72_02_cpsACP,KL72_12_wzy	O2v1	O2	-+*	None
07A044T	SB30	K. quasipneumoniae subsp similipneumoniae	ST1215	Hospital acquired	Human	Blood	Germany	1997	5189735	5084979	1	4825	1220	25.28	2298	93.6	0.72	79	9	4	2	CP084787-88	PacBio	SAMN22024805	0	0	0	0	-	0	-	0	-	0	-	0	-	0	-	wzi164	KL53	none	Very high	0.9806		O3/O3a	O3/O3a	none	Very high
09A323	SB164	K. quasipneumoniae subsp similipneumoniae	ST18	Hospital acquired	Human	Blood	Greece	1997	5449678	5171734	3	5101	1210	23.72	2296	93.6	0.75	78	10	5	1	CP084783-86	Illumina + ONT	SAMN22024806	1	1	4	7	ybt 10; ICEKp4	91-1LV	-	0	-	0	-	0	-	0	-	wzi44	KL123	none	Very high	0.9999		O3/O3a	O3/O3a	none	Very high
12A476	SB203	K. quasipneumoniae subsp similipneumoniae	ST384	Hospital acquired	Human	Blood	Netherlands	1998	5482753	5106924	3	5111	1200	23.48	2289	96.8	0.88	78	13	3	0	CP084779-82	Illumina + ONT	SAMN22024807	0	0	2	2	-	0	-	0	-	0	-	0	-	0	-	-	KL61	*	Very high	0.9585		O3/O3a	O3/O3a	none	Very high
CIP 110288 (= CW-D3)	SB4697	K. quasipneumoniae subsp similipneumoniae	ST2275	Environment	Soil (polluted)		China	2010	5394763	5243322	1	4996	1219	24.4	2299	95.7	0.8	81	9	3	1	CP084777-78	Illumina + ONT	SAMN22024808	0	0	0	0	-	0	-	0	-	0	-	0	-	0	-	wzi407	KL57	*	Very high	0.9631		O3/O3a	O3/O3a	none	Very high
SB610	SB610	K. quasipneumoniae subsp similipneumoniae	ST2276	Environment	Water (environment)		Netherlands	2000	6047783	5255898	6	5704	1200	20.86	2283	94.7	0.81	76	13	4	1	CP084770-76	Illumina + ONT	SAMN22024809	0	0	0	0	-	0	-	0	-	0	-	0	-	0	-	wzi545	KL111	*	Very high	0.9717		O12	O12	none	Very high
08A119	SB33	K. quasivariicola	ST1214	Hospital acquired	Human	Blood	Germany	1997	5507230	5489214	1	5470	1225	22.39	2293	93.6	0.71	80	8	5	1	CP084768-69	PacBio	SAMN22024810	0	0	0	0	-	0	-	0	-	0	-	0	-	0	-	wzi158	KL51	none	Very high	0.9746		O1v2	O1	none	Very high
CDC 4241-71	SB94	K. variicola subsp tropica	ST1216	Environment	Environment	N/A	unknown	unknown	5544082	5544082	0	5147	1227	23.84	2304	95.7	0.81	81	9	4	0	CP084767	PacBio	SAMN22024811	0	0	0	0	-	0	-	0	-	0	-	0	-	0	-	wzi166	KL23	-*	High	0.8757	KL23_09_wckU	OL103	OL103	none	Very high
01A065	SB1	K. variicola subsp variicola	ST2273	Hospital acquired	Human	Blood	Austria	1997	5467687	5467687	0	5078	1212	23.87	2294	94.7	0.79	79	10	5	0	CP084766	Illumina + ONT	SAMN22024812	0	0	0	0	-	0	-	0	-	0	-	0	-	0	-	wzi32	KL31	*	High	0.9052		O3/O3a	O3/O3a	none	Very high
342	SB579	K. variicola subsp variicola	ST146	Environment	Maize	N/A	USA	unknown	5920257	5641239	2	5530	1222	22.1	2296	91.5	0.71	76	10	8	0	NC_011281-83	public genome	SAMN02603449	0	0	0	0	-	0	-	0	-	0	-	0	-	0	-	wzi159	KL30	*	Very high	0.954		O3/O3a	O3/O3a	none	Very high
At-22	SB4767	K. variicola subsp variicola	ST1220	Environment	Atta cephalotes fungus garden		unknown	unknown	5458505	5458505	0	5081	1223	24.07	2300	96.8	0.84	83	8	3	0	NC_013850	public genome	SAMN02598515	0	0	0	0	-	0	-	0	-	0	-	0	-	0	-	wzi170	KL134	*	Very high	0.9795		O3/O3a	O3/O3a	none	Very high
F2R9T	SB48	K. variicola subsp variicola	ST2263	Environment	Banana	Root	Mexico	unknown	5521194	5521194	0	5127	1227	23.93	2301	93.6	0.73	80	8	6	0	CP084765	Illumina + ONT	SAMN22024815	0	0	0	0	-	0	-	0	-	0	-	0	-	0	-	wzi251	KL16	*	Very high	0.9734		O3/O3a	O3/O3a	none	Very high
[truncated: 73 more columns]
