# Supplementary material for: A curated collection of Klebsiella metabolic models reveals variable substrate usage and gene essentiality
Source: Genome Res. 2022 May;32(5):1004–14. doi: 10.1101/gr.276289.121 (PMC9104693; doi:10.1101/gr.276289.121)
Supplement: Supplemental Material [file supp_gr.276289.121_Supplemental_Table_S5.xlsx]

## Sheet: SuppTable_vitek_comparisons
Supplemental Table 5: Details of model predictions vs phenotypic growth (as determined by Vitek) for 13 substrates in each strain-specific GEM.
strain	vitek_code	exchange_reaction	vitek_growth_call	model_value	call
K_variicola_variicola_01A065	SAC	EX_sucr_e	+	1	TP
K_variicola_variicola_01A065	ADO	EX_rbt_e	-	0	TN
K_variicola_variicola_01A065	dMAL	EX_malt_e	+	1	TP
K_variicola_variicola_01A065	dTAG	EX_tag__D_e	-	0	TN
K_variicola_variicola_01A065	dMAN	EX_mnl_e	+	1	TP
K_variicola_variicola_01A065	PLE	EX_pala_e	+	1	TP
K_variicola_variicola_01A065	dTRE	EX_tre_e	+	1	TP
K_variicola_variicola_01A065	SUCT	EX_succ_e	+	1	TP
K_variicola_variicola_01A065	dMNE	EX_man_e	+	1	TP
K_variicola_variicola_01A065	CIT	EX_cit_e	+	1	TP
K_variicola_variicola_01A065	dCEL	EX_cellb_e	+	1	TP
K_variicola_variicola_01A065	dSOR	EX_sbt__D_e	+	1	TP
K_variicola_variicola_01A065	5KG	EX_5dglcn_e	+	1	TP
K_pneumoniae_SB1067	SAC	EX_sucr_e	+	1	TP
K_pneumoniae_SB1067	ADO	EX_rbt_e	+	1	TP
K_pneumoniae_SB1067	dMAL	EX_malt_e	+	1	TP
K_pneumoniae_SB1067	dTAG	EX_tag__D_e	-	0	TN
K_pneumoniae_SB1067	dMAN	EX_mnl_e	+	1	TP
K_pneumoniae_SB1067	PLE	EX_pala_e	+	1	TP
K_pneumoniae_SB1067	dTRE	EX_tre_e	+	1	TP
K_pneumoniae_SB1067	SUCT	EX_succ_e	+	1	TP
K_pneumoniae_SB1067	dMNE	EX_man_e	+	1	TP
K_pneumoniae_SB1067	CIT	EX_cit_e	+	1	TP
K_pneumoniae_SB1067	dCEL	EX_cellb_e	+	1	TP
K_pneumoniae_SB1067	dSOR	EX_sbt__D_e	+	1	TP
K_pneumoniae_SB1067	5KG	EX_5dglcn_e	-	0	TN
K_pneumoniae_MGH78578	SAC	EX_sucr_e	+	1	TP
K_pneumoniae_MGH78578	ADO	EX_rbt_e	+	1	TP
K_pneumoniae_MGH78578	dMAL	EX_malt_e	+	1	TP
K_pneumoniae_MGH78578	dTAG	EX_tag__D_e	+	1	TP
K_pneumoniae_MGH78578	dMAN	EX_mnl_e	+	1	TP
K_pneumoniae_MGH78578	PLE	EX_pala_e	+	1	TP
K_pneumoniae_MGH78578	dTRE	EX_tre_e	+	1	TP
K_pneumoniae_MGH78578	SUCT	EX_succ_e	+	1	TP
K_pneumoniae_MGH78578	dMNE	EX_man_e	+	1	TP
K_pneumoniae_MGH78578	CIT	EX_cit_e	+	1	TP
K_pneumoniae_MGH78578	dCEL	EX_cellb_e	+	1	TP
K_pneumoniae_MGH78578	dSOR	EX_sbt__D_e	+	1	TP
K_pneumoniae_MGH78578	5KG	EX_5dglcn_e	-	0	TN
K_quasi_quasi_01A030T	SAC	EX_sucr_e	+	1	TP
K_quasi_quasi_01A030T	ADO	EX_rbt_e	-	0	TN
K_quasi_quasi_01A030T	dMAL	EX_malt_e	+	1	TP
K_quasi_quasi_01A030T	dTAG	EX_tag__D_e	-	0	TN
K_quasi_quasi_01A030T	dMAN	EX_mnl_e	+	1	TP
K_quasi_quasi_01A030T	PLE	EX_pala_e	+	1	TP
K_quasi_quasi_01A030T	dTRE	EX_tre_e	+	1	TP
K_quasi_quasi_01A030T	SUCT	EX_succ_e	+	1	TP
K_quasi_quasi_01A030T	dMNE	EX_man_e	+	1	TP
K_quasi_quasi_01A030T	CIT	EX_cit_e	+	1	TP
K_quasi_quasi_01A030T	dCEL	EX_cellb_e	+	1	TP
K_quasi_quasi_01A030T	dSOR	EX_sbt__D_e	+	1	TP
K_quasi_quasi_01A030T	5KG	EX_5dglcn_e	-	0	TN
K_quasi_quasi_SB1124	SAC	EX_sucr_e	+	1	TP
K_quasi_quasi_SB1124	ADO	EX_rbt_e	-	0	TN
K_quasi_quasi_SB1124	dMAL	EX_malt_e	+	1	TP
K_quasi_quasi_SB1124	dTAG	EX_tag__D_e	-	0	TN
K_quasi_quasi_SB1124	dMAN	EX_mnl_e	+	1	TP
K_quasi_quasi_SB1124	PLE	EX_pala_e	+	1	TP
K_quasi_quasi_SB1124	dTRE	EX_tre_e	+	1	TP
K_quasi_quasi_SB1124	SUCT	EX_succ_e	+	1	TP
K_quasi_quasi_SB1124	dMNE	EX_man_e	+	1	TP
K_quasi_quasi_SB1124	CIT	EX_cit_e	+	1	TP
K_quasi_quasi_SB1124	dCEL	EX_cellb_e	+	1	TP
K_quasi_quasi_SB1124	dSOR	EX_sbt__D_e	+	1	TP
K_quasi_quasi_SB1124	5KG	EX_5dglcn_e	-	0	TN
K_pneumoniae_SB1139	SAC	EX_sucr_e	+	1	TP
K_pneumoniae_SB1139	ADO	EX_rbt_e	+	1	TP
K_pneumoniae_SB1139	dMAL	EX_malt_e	+	1	TP
K_pneumoniae_SB1139	dTAG	EX_tag__D_e	+	1	TP
K_pneumoniae_SB1139	dMAN	EX_mnl_e	+	1	TP
K_pneumoniae_SB1139	PLE	EX_pala_e	+	1	TP
K_pneumoniae_SB1139	dTRE	EX_tre_e	+	1	TP
K_pneumoniae_SB1139	SUCT	EX_succ_e	+	1	TP
K_pneumoniae_SB1139	dMNE	EX_man_e	+	1	TP
K_pneumoniae_SB1139	CIT	EX_cit_e	+	1	TP
K_pneumoniae_SB1139	dCEL	EX_cellb_e	+	1	TP
K_pneumoniae_SB1139	dSOR	EX_sbt__D_e	+	1	TP
K_pneumoniae_SB1139	5KG	EX_5dglcn_e	-	0	TN
K_pneumoniae_SB1170	SAC	EX_sucr_e	+	1	TP
K_pneumoniae_SB1170	ADO	EX_rbt_e	+	1	TP
K_pneumoniae_SB1170	dMAL	EX_malt_e	+	1	TP
K_pneumoniae_SB1170	dTAG	EX_tag__D_e	+	1	TP
K_pneumoniae_SB1170	dMAN	EX_mnl_e	+	1	TP
K_pneumoniae_SB1170	PLE	EX_pala_e	+	1	TP
K_pneumoniae_SB1170	dTRE	EX_tre_e	+	1	TP
K_pneumoniae_SB1170	SUCT	EX_succ_e	+	1	TP
K_pneumoniae_SB1170	dMNE	EX_man_e	+	1	TP
K_pneumoniae_SB1170	CIT	EX_cit_e	+	1	TP
K_pneumoniae_SB1170	dCEL	EX_cellb_e	+	1	TP
K_pneumoniae_SB1170	dSOR	EX_sbt__D_e	+	1	TP
K_pneumoniae_SB1170	5KG	EX_5dglcn_e	-	0	TN
K_quasi_simil_09A323	SAC	EX_sucr_e	+	1	TP
K_quasi_simil_09A323	ADO	EX_rbt_e	+	1	TP
K_quasi_simil_09A323	dMAL	EX_malt_e	+	1	TP
K_quasi_simil_09A323	dTAG	EX_tag__D_e	+	1	TP
K_quasi_simil_09A323	dMAN	EX_mnl_e	+	1	TP
K_quasi_simil_09A323	PLE	EX_pala_e	+	1	TP
K_quasi_simil_09A323	dTRE	EX_tre_e	+	1	TP
K_quasi_simil_09A323	SUCT	EX_succ_e	+	1	TP
K_quasi_simil_09A323	dMNE	EX_man_e	+	1	TP
K_quasi_simil_09A323	CIT	EX_cit_e	+	1	TP
K_quasi_simil_09A323	dCEL	EX_cellb_e	+	1	TP
K_quasi_simil_09A323	dSOR	EX_sbt__D_e	+	1	TP
K_quasi_simil_09A323	5KG	EX_5dglcn_e	-	0	TN
K_pneumoniae_04A025	SAC	EX_sucr_e	+	1	TP
K_pneumoniae_04A025	ADO	EX_rbt_e	+	1	TP
K_pneumoniae_04A025	dMAL	EX_malt_e	+	1	TP
K_pneumoniae_04A025	dTAG	EX_tag__D_e	-	0	TN
K_pneumoniae_04A025	dMAN	EX_mnl_e	+	1	TP
K_pneumoniae_04A025	PLE	EX_pala_e	+	1	TP
K_pneumoniae_04A025	dTRE	EX_tre_e	+	1	TP
K_pneumoniae_04A025	SUCT	EX_succ_e	+	1	TP
K_pneumoniae_04A025	dMNE	EX_man_e	+	1	TP
K_pneumoniae_04A025	CIT	EX_cit_e	+	1	TP
K_pneumoniae_04A025	dCEL	EX_cellb_e	+	1	TP
K_pneumoniae_04A025	dSOR	EX_sbt__D_e	+	1	TP
K_pneumoniae_04A025	5KG	EX_5dglcn_e	-	0	TN
K_quasi_simil_12A476	SAC	EX_sucr_e	+	1	TP
K_quasi_simil_12A476	ADO	EX_rbt_e	+	1	TP
K_quasi_simil_12A476	dMAL	EX_malt_e	+	1	TP
K_quasi_simil_12A476	dTAG	EX_tag__D_e	-	0	TN
K_quasi_simil_12A476	dMAN	EX_mnl_e	+	1	TP
K_quasi_simil_12A476	PLE	EX_pala_e	+	1	TP
K_quasi_simil_12A476	dTRE	EX_tre_e	+	1	TP
K_quasi_simil_12A476	SUCT	EX_succ_e	+	1	TP
K_quasi_simil_12A476	dMNE	EX_man_e	+	1	TP
K_quasi_simil_12A476	CIT	EX_cit_e	+	1	TP
K_quasi_simil_12A476	dCEL	EX_cellb_e	+	1	TP
K_quasi_simil_12A476	dSOR	EX_sbt__D_e	+	1	TP
K_quasi_simil_12A476	5KG	EX_5dglcn_e	-	0	TN
K_quasi_quasi_U41	SAC	EX_sucr_e	+	1	TP
K_quasi_quasi_U41	ADO	EX_rbt_e	+	1	TP
K_quasi_quasi_U41	dMAL	EX_malt_e	+	1	TP
K_quasi_quasi_U41	dTAG	EX_tag__D_e	-	0	TN
K_quasi_quasi_U41	dMAN	EX_mnl_e	+	1	TP
K_quasi_quasi_U41	PLE	EX_pala_e	+	1	TP
K_quasi_quasi_U41	dTRE	EX_tre_e	+	1	TP
K_quasi_quasi_U41	SUCT	EX_succ_e	+	1	TP
K_quasi_quasi_U41	dMNE	EX_man_e	+	1	TP
K_quasi_quasi_U41	CIT	EX_cit_e	+	1	TP
K_quasi_quasi_U41	dCEL	EX_cellb_e	+	1	TP
K_quasi_quasi_U41	dSOR	EX_sbt__D_e	+	1	TP
K_quasi_quasi_U41	5KG	EX_5dglcn_e	-	1	FP
K_pneumoniae_SB2390	SAC	EX_sucr_e	+	1	TP
K_pneumoniae_SB2390	ADO	EX_rbt_e	+	1	TP
K_pneumoniae_SB2390	dMAL	EX_malt_e	+	1	TP
K_pneumoniae_SB2390	dTAG	EX_tag__D_e	-	0	TN
K_pneumoniae_SB2390	dMAN	EX_mnl_e	+	1	TP
K_pneumoniae_SB2390	PLE	EX_pala_e	+	1	TP
K_pneumoniae_SB2390	dTRE	EX_tre_e	+	1	TP
K_pneumoniae_SB2390	SUCT	EX_succ_e	+	1	TP
K_pneumoniae_SB2390	dMNE	EX_man_e	+	1	TP
K_pneumoniae_SB2390	CIT	EX_cit_e	+	1	TP
K_pneumoniae_SB2390	dCEL	EX_cellb_e	+	1	TP
K_pneumoniae_SB2390	dSOR	EX_sbt__D_e	+	1	TP
K_pneumoniae_SB2390	5KG	EX_5dglcn_e	-	0	TN
K_quasi_simil_07A044T	SAC	EX_sucr_e	+	1	TP
K_quasi_simil_07A044T	ADO	EX_rbt_e	+	1	TP
K_quasi_simil_07A044T	dMAL	EX_malt_e	+	1	TP
K_quasi_simil_07A044T	dTAG	EX_tag__D_e	+	1	TP
K_quasi_simil_07A044T	dMAN	EX_mnl_e	+	1	TP
K_quasi_simil_07A044T	PLE	EX_pala_e	+	1	TP
K_quasi_simil_07A044T	dTRE	EX_tre_e	+	1	TP
K_quasi_simil_07A044T	SUCT	EX_succ_e	+	1	TP
K_quasi_simil_07A044T	dMNE	EX_man_e	+	1	TP
K_quasi_simil_07A044T	CIT	EX_cit_e	+	1	TP
K_quasi_simil_07A044T	dCEL	EX_cellb_e	+	1	TP
K_quasi_simil_07A044T	dSOR	EX_sbt__D_e	+	1	TP
K_quasi_simil_07A044T	5KG	EX_5dglcn_e	-	0	TN
K_quasivariicola_08A119	SAC	EX_sucr_e	+	1	TP
K_quasivariicola_08A119	ADO	EX_rbt_e	-	0	TN
K_quasivariicola_08A119	dMAL	EX_malt_e	+	1	TP
K_quasivariicola_08A119	dTAG	EX_tag__D_e	+	1	TP
K_quasivariicola_08A119	dMAN	EX_mnl_e	+	1	TP
K_quasivariicola_08A119	PLE	EX_pala_e	+	1	TP
K_quasivariicola_08A119	dTRE	EX_tre_e	+	1	TP
K_quasivariicola_08A119	SUCT	EX_succ_e	+	1	TP
K_quasivariicola_08A119	dMNE	EX_man_e	+	1	TP
K_quasivariicola_08A119	CIT	EX_cit_e	+	1	TP
K_quasivariicola_08A119	dCEL	EX_cellb_e	+	1	TP
K_quasivariicola_08A119	dSOR	EX_sbt__D_e	+	1	TP
K_quasivariicola_08A119	5KG	EX_5dglcn_e	+	1	TP
K_pneumoniae_03-9138-2	SAC	EX_sucr_e	+	1	TP
K_pneumoniae_03-9138-2	ADO	EX_rbt_e	+	1	TP
K_pneumoniae_03-9138-2	dMAL	EX_malt_e	+	1	TP
K_pneumoniae_03-9138-2	dTAG	EX_tag__D_e	-	0	TN
K_pneumoniae_03-9138-2	dMAN	EX_mnl_e	+	1	TP
K_pneumoniae_03-9138-2	PLE	EX_pala_e	+	1	TP
K_pneumoniae_03-9138-2	dTRE	EX_tre_e	+	1	TP
K_pneumoniae_03-9138-2	SUCT	EX_succ_e	+	1	TP
K_pneumoniae_03-9138-2	dMNE	EX_man_e	+	1	TP
K_pneumoniae_03-9138-2	CIT	EX_cit_e	+	1	TP
K_pneumoniae_03-9138-2	dCEL	EX_cellb_e	+	1	TP
K_pneumoniae_03-9138-2	dSOR	EX_sbt__D_e	+	1	TP
K_pneumoniae_03-9138-2	5KG	EX_5dglcn_e	-	0	TN
K_pneumoniae_CIP52_145	SAC	EX_sucr_e	+	1	TP
K_pneumoniae_CIP52_145	ADO	EX_rbt_e	+	1	TP
K_pneumoniae_CIP52_145	dMAL	EX_malt_e	+	1	TP
K_pneumoniae_CIP52_145	dTAG	EX_tag__D_e	-	0	TN
K_pneumoniae_CIP52_145	dMAN	EX_mnl_e	+	1	TP
K_pneumoniae_CIP52_145	PLE	EX_pala_e	+	1	TP
K_pneumoniae_CIP52_145	dTRE	EX_tre_e	+	1	TP
K_pneumoniae_CIP52_145	SUCT	EX_succ_e	-	1	FP
K_pneumoniae_CIP52_145	dMNE	EX_man_e	+	1	TP
K_pneumoniae_CIP52_145	CIT	EX_cit_e	+	1	TP
K_pneumoniae_CIP52_145	dCEL	EX_cellb_e	+	1	TP
K_pneumoniae_CIP52_145	dSOR	EX_sbt__D_e	+	1	TP
K_pneumoniae_CIP52_145	5KG	EX_5dglcn_e	-	0	TN
K_pneumoniae_NTUH_K2044	SAC	EX_sucr_e	+	1	TP
K_pneumoniae_NTUH_K2044	ADO	EX_rbt_e	+	1	TP
K_pneumoniae_NTUH_K2044	dMAL	EX_malt_e	+	1	TP
K_pneumoniae_NTUH_K2044	dTAG	EX_tag__D_e	+	1	TP
K_pneumoniae_NTUH_K2044	dMAN	EX_mnl_e	+	1	TP
K_pneumoniae_NTUH_K2044	PLE	EX_pala_e	+	1	TP
K_pneumoniae_NTUH_K2044	dTRE	EX_tre_e	+	1	TP
K_pneumoniae_NTUH_K2044	SUCT	EX_succ_e	+	1	TP
K_pneumoniae_NTUH_K2044	dMNE	EX_man_e	+	1	TP
K_pneumoniae_NTUH_K2044	CIT	EX_cit_e	+	1	TP
K_pneumoniae_NTUH_K2044	dCEL	EX_cellb_e	+	1	TP
K_pneumoniae_NTUH_K2044	dSOR	EX_sbt__D_e	+	1	TP
K_pneumoniae_NTUH_K2044	5KG	EX_5dglcn_e	-	0	TN
K_pneumoniae_SA1	SAC	EX_sucr_e	+	1	TP
K_pneumoniae_SA1	ADO	EX_rbt_e	+	1	TP
K_pneumoniae_SA1	dMAL	EX_malt_e	+	1	TP
K_pneumoniae_SA1	dTAG	EX_tag__D_e	-	0	TN
K_pneumoniae_SA1	dMAN	EX_mnl_e	+	1	TP
K_pneumoniae_SA1	PLE	EX_pala_e	+	1	TP
K_pneumoniae_SA1	dTRE	EX_tre_e	+	1	TP
K_pneumoniae_SA1	SUCT	EX_succ_e	+	1	TP
K_pneumoniae_SA1	dMNE	EX_man_e	+	1	TP
K_pneumoniae_SA1	CIT	EX_cit_e	+	1	TP
K_pneumoniae_SA1	dCEL	EX_cellb_e	+	1	TP
K_pneumoniae_SA1	dSOR	EX_sbt__D_e	+	1	TP
K_pneumoniae_SA1	5KG	EX_5dglcn_e	-	0	TN
K_pneumoniae_SA12	SAC	EX_sucr_e	+	1	TP
K_pneumoniae_SA12	ADO	EX_rbt_e	+	1	TP
K_pneumoniae_SA12	dMAL	EX_malt_e	+	1	TP
K_pneumoniae_SA12	dTAG	EX_tag__D_e	+	1	TP
K_pneumoniae_SA12	dMAN	EX_mnl_e	+	1	TP
K_pneumoniae_SA12	PLE	EX_pala_e	+	1	TP
K_pneumoniae_SA12	dTRE	EX_tre_e	+	1	TP
K_pneumoniae_SA12	SUCT	EX_succ_e	+	1	TP
K_pneumoniae_SA12	dMNE	EX_man_e	+	1	TP
K_pneumoniae_SA12	CIT	EX_cit_e	+	1	TP
K_pneumoniae_SA12	dCEL	EX_cellb_e	+	1	TP
K_pneumoniae_SA12	dSOR	EX_sbt__D_e	+	1	TP
K_pneumoniae_SA12	5KG	EX_5dglcn_e	-	0	TN
K_pneumoniae_CG43	SAC	EX_sucr_e	+	1	TP
K_pneumoniae_CG43	ADO	EX_rbt_e	+	1	TP
K_pneumoniae_CG43	dMAL	EX_malt_e	+	1	TP
K_pneumoniae_CG43	dTAG	EX_tag__D_e	-	0	TN
K_pneumoniae_CG43	dMAN	EX_mnl_e	+	1	TP
K_pneumoniae_CG43	PLE	EX_pala_e	+	1	TP
K_pneumoniae_CG43	dTRE	EX_tre_e	+	1	TP
K_pneumoniae_CG43	SUCT	EX_succ_e	+	1	TP
K_pneumoniae_CG43	dMNE	EX_man_e	+	1	TP
K_pneumoniae_CG43	CIT	EX_cit_e	+	1	TP
K_pneumoniae_CG43	dCEL	EX_cellb_e	+	1	TP
K_pneumoniae_CG43	dSOR	EX_sbt__D_e	+	1	TP
K_pneumoniae_CG43	5KG	EX_5dglcn_e	-	0	TN
K_pneumoniae_BJ1	SAC	EX_sucr_e	+	1	TP
K_pneumoniae_BJ1	ADO	EX_rbt_e	+	1	TP
K_pneumoniae_BJ1	dMAL	EX_malt_e	+	1	TP
K_pneumoniae_BJ1	dTAG	EX_tag__D_e	-	0	TN
K_pneumoniae_BJ1	dMAN	EX_mnl_e	+	1	TP
K_pneumoniae_BJ1	PLE	EX_pala_e	+	1	TP
K_pneumoniae_BJ1	dTRE	EX_tre_e	+	1	TP
K_pneumoniae_BJ1	SUCT	EX_succ_e	+	1	TP
K_pneumoniae_BJ1	dMNE	EX_man_e	+	1	TP
K_pneumoniae_BJ1	CIT	EX_cit_e	+	1	TP
K_pneumoniae_BJ1	dCEL	EX_cellb_e	+	1	TP
K_pneumoniae_BJ1	dSOR	EX_sbt__D_e	+	1	TP
K_pneumoniae_BJ1	5KG	EX_5dglcn_e	-	0	TN
K_pneumoniae_T69	SAC	EX_sucr_e	+	1	TP
K_pneumoniae_T69	ADO	EX_rbt_e	+	1	TP
K_pneumoniae_T69	dMAL	EX_malt_e	+	1	TP
K_pneumoniae_T69	dTAG	EX_tag__D_e	-	0	TN
K_pneumoniae_T69	dMAN	EX_mnl_e	+	1	TP
K_pneumoniae_T69	PLE	EX_pala_e	+	1	TP
K_pneumoniae_T69	dTRE	EX_tre_e	+	1	TP
K_pneumoniae_T69	SUCT	EX_succ_e	+	1	TP
K_pneumoniae_T69	dMNE	EX_man_e	+	1	TP
K_pneumoniae_T69	CIT	EX_cit_e	+	1	TP
K_pneumoniae_T69	dCEL	EX_cellb_e	+	1	TP
K_pneumoniae_T69	dSOR	EX_sbt__D_e	+	1	TP
K_pneumoniae_T69	5KG	EX_5dglcn_e	-	0	TN
K_quasi_simil_CIP110288	SAC	EX_sucr_e	+	1	TP
K_quasi_simil_CIP110288	ADO	EX_rbt_e	+	1	TP
K_quasi_simil_CIP110288	dMAL	EX_malt_e	+	1	TP
K_quasi_simil_CIP110288	dTAG	EX_tag__D_e	+	1	TP
K_quasi_simil_CIP110288	dMAN	EX_mnl_e	+	1	TP
K_quasi_simil_CIP110288	PLE	EX_pala_e	+	1	TP
K_quasi_simil_CIP110288	dTRE	EX_tre_e	+	1	TP
K_quasi_simil_CIP110288	SUCT	EX_succ_e	+	1	TP
K_quasi_simil_CIP110288	dMNE	EX_man_e	+	1	TP
K_quasi_simil_CIP110288	CIT	EX_cit_e	+	1	TP
K_quasi_simil_CIP110288	dCEL	EX_cellb_e	+	1	TP
K_quasi_simil_CIP110288	dSOR	EX_sbt__D_e	+	1	TP
K_quasi_simil_CIP110288	5KG	EX_5dglcn_e	-	0	TN
K_variicola_variicola_At-22	SAC	EX_sucr_e	+	1	TP
K_variicola_variicola_At-22	ADO	EX_rbt_e	-	0	TN
K_variicola_variicola_At-22	dMAL	EX_malt_e	+	1	TP
K_variicola_variicola_At-22	dTAG	EX_tag__D_e	+	1	TP
K_variicola_variicola_At-22	dMAN	EX_mnl_e	+	1	TP
K_variicola_variicola_At-22	PLE	EX_pala_e	+	1	TP
K_variicola_variicola_At-22	dTRE	EX_tre_e	+	1	TP
K_variicola_variicola_At-22	SUCT	EX_succ_e	+	1	TP
K_variicola_variicola_At-22	dMNE	EX_man_e	+	1	TP
K_variicola_variicola_At-22	CIT	EX_cit_e	+	1	TP
K_variicola_variicola_At-22	dCEL	EX_cellb_e	+	1	TP
K_variicola_variicola_At-22	dSOR	EX_sbt__D_e	+	1	TP
K_variicola_variicola_At-22	5KG	EX_5dglcn_e	+	1	TP
K_variicola_variicola_F2R9T	SAC	EX_sucr_e	+	1	TP
K_variicola_variicola_F2R9T	ADO	EX_rbt_e	-	0	TN
K_variicola_variicola_F2R9T	dMAL	EX_malt_e	+	1	TP
K_variicola_variicola_F2R9T	dTAG	EX_tag__D_e	+	1	TP
K_variicola_variicola_F2R9T	dMAN	EX_mnl_e	+	1	TP
K_variicola_variicola_F2R9T	PLE	EX_pala_e	+	1	TP
K_variicola_variicola_F2R9T	dTRE	EX_tre_e	+	1	TP
K_variicola_variicola_F2R9T	SUCT	EX_succ_e	+	1	TP
K_variicola_variicola_F2R9T	dMNE	EX_man_e	+	1	TP
K_variicola_variicola_F2R9T	CIT	EX_cit_e	+	1	TP
K_variicola_variicola_F2R9T	dCEL	EX_cellb_e	+	1	TP
K_variicola_variicola_F2R9T	dSOR	EX_sbt__D_e	+	1	TP
K_variicola_variicola_F2R9T	5KG	EX_5dglcn_e	+	1	TP
K_pneumoniae_KP13	SAC	EX_sucr_e	+	1	TP
K_pneumoniae_KP13	ADO	EX_rbt_e	+	1	TP
K_pneumoniae_KP13	dMAL	EX_malt_e	+	1	TP
K_pneumoniae_KP13	dTAG	EX_tag__D_e	-	0	TN
K_pneumoniae_KP13	dMAN	EX_mnl_e	+	1	TP
K_pneumoniae_KP13	PLE	EX_pala_e	+	1	TP
K_pneumoniae_KP13	dTRE	EX_tre_e	+	1	TP
K_pneumoniae_KP13	SUCT	EX_succ_e	+	1	TP
K_pneumoniae_KP13	dMNE	EX_man_e	+	1	TP
K_pneumoniae_KP13	CIT	EX_cit_e	+	1	TP
K_pneumoniae_KP13	dCEL	EX_cellb_e	+	1	TP
K_pneumoniae_KP13	dSOR	EX_sbt__D_e	+	1	TP
K_pneumoniae_KP13	5KG	EX_5dglcn_e	-	0	TN
K_pneumoniae_NJST258-1	SAC	EX_sucr_e	+	1	TP
K_pneumoniae_NJST258-1	ADO	EX_rbt_e	+	1	TP
K_pneumoniae_NJST258-1	dMAL	EX_malt_e	+	1	TP
K_pneumoniae_NJST258-1	dTAG	EX_tag__D_e	-	1	FP
K_pneumoniae_NJST258-1	dMAN	EX_mnl_e	+	1	TP
K_pneumoniae_NJST258-1	PLE	EX_pala_e	+	1	TP
K_pneumoniae_NJST258-1	dTRE	EX_tre_e	+	1	TP
K_pneumoniae_NJST258-1	SUCT	EX_succ_e	+	1	TP
K_pneumoniae_NJST258-1	dMNE	EX_man_e	+	1	TP
K_pneumoniae_NJST258-1	CIT	EX_cit_e	+	1	TP
K_pneumoniae_NJST258-1	dCEL	EX_cellb_e	+	1	TP
K_pneumoniae_NJST258-1	dSOR	EX_sbt__D_e	+	1	TP
K_pneumoniae_NJST258-1	5KG	EX_5dglcn_e	-	0	TN
K_variicola_variicola_342	SAC	EX_sucr_e	+	1	TP
K_variicola_variicola_342	ADO	EX_rbt_e	-	0	TN
K_variicola_variicola_342	dMAL	EX_malt_e	+	1	TP
K_variicola_variicola_342	dTAG	EX_tag__D_e	-	0	TN
K_variicola_variicola_342	dMAN	EX_mnl_e	+	1	TP
K_variicola_variicola_342	PLE	EX_pala_e	+	1	TP
K_variicola_variicola_342	dTRE	EX_tre_e	+	1	TP
K_variicola_variicola_342	SUCT	EX_succ_e	+	1	TP
K_variicola_variicola_342	dMNE	EX_man_e	+	1	TP
K_variicola_variicola_342	CIT	EX_cit_e	+	1	TP
K_variicola_variicola_342	dCEL	EX_cellb_e	+	1	TP
K_variicola_variicola_342	dSOR	EX_sbt__D_e	+	1	TP
K_variicola_variicola_342	5KG	EX_5dglcn_e	+	1	TP
K_africa_200023T	SAC	EX_sucr_e	+	1	TP
K_africa_200023T	ADO	EX_rbt_e	-	0	TN
K_africa_200023T	dMAL	EX_malt_e	+	1	TP
K_africa_200023T	dTAG	EX_tag__D_e	+	1	TP
K_africa_200023T	dMAN	EX_mnl_e	+	1	TP
K_africa_200023T	PLE	EX_pala_e	+	1	TP
K_africa_200023T	dTRE	EX_tre_e	+	1	TP
K_africa_200023T	SUCT	EX_succ_e	+	1	TP
K_africa_200023T	dMNE	EX_man_e	+	1	TP
K_africa_200023T	CIT	EX_cit_e	+	1	TP
K_africa_200023T	dCEL	EX_cellb_e	+	1	TP
K_africa_200023T	dSOR	EX_sbt__D_e	+	1	TP
K_africa_200023T	5KG	EX_5dglcn_e	+	1	TP
K_quasi_quasi_18A069	SAC	EX_sucr_e	+	1	TP
K_quasi_quasi_18A069	ADO	EX_rbt_e	+	1	TP
K_quasi_quasi_18A069	dMAL	EX_malt_e	+	1	TP
K_quasi_quasi_18A069	dTAG	EX_tag__D_e	-	0	TN
K_quasi_quasi_18A069	dMAN	EX_mnl_e	+	1	TP
K_quasi_quasi_18A069	PLE	EX_pala_e	+	1	TP
K_quasi_quasi_18A069	dTRE	EX_tre_e	+	1	TP
K_quasi_quasi_18A069	SUCT	EX_succ_e	+	1	TP
K_quasi_quasi_18A069	dMNE	EX_man_e	+	1	TP
K_quasi_quasi_18A069	CIT	EX_cit_e	+	1	TP
K_quasi_quasi_18A069	dCEL	EX_cellb_e	+	1	TP
K_quasi_quasi_18A069	dSOR	EX_sbt__D_e	+	1	TP
K_quasi_quasi_18A069	5KG	EX_5dglcn_e	-	0	TN
K_quasi_simil_SB610	SAC	EX_sucr_e	+	1	TP
K_quasi_simil_SB610	ADO	EX_rbt_e	+	1	TP
K_quasi_simil_SB610	dMAL	EX_malt_e	+	1	TP
K_quasi_simil_SB610	dTAG	EX_tag__D_e	-	0	TN
K_quasi_simil_SB610	dMAN	EX_mnl_e	+	1	TP
K_quasi_simil_SB610	PLE	EX_pala_e	+	1	TP
K_quasi_simil_SB610	dTRE	EX_tre_e	+	1	TP
K_quasi_simil_SB610	SUCT	EX_succ_e	+	1	TP
K_quasi_simil_SB610	dMNE	EX_man_e	+	1	TP
K_quasi_simil_SB610	CIT	EX_cit_e	+	1	TP
K_quasi_simil_SB610	dCEL	EX_cellb_e	+	1	TP
K_quasi_simil_SB610	dSOR	EX_sbt__D_e	+	1	TP
K_quasi_simil_SB610	5KG	EX_5dglcn_e	-	0	TN
K_pneumoniae_SB611	SAC	EX_sucr_e	+	1	TP
K_pneumoniae_SB611	ADO	EX_rbt_e	+	1	TP
K_pneumoniae_SB611	dMAL	EX_malt_e	+	1	TP
K_pneumoniae_SB611	dTAG	EX_tag__D_e	-	0	TN
K_pneumoniae_SB611	dMAN	EX_mnl_e	+	1	TP
K_pneumoniae_SB611	PLE	EX_pala_e	+	1	TP
K_pneumoniae_SB611	dTRE	EX_tre_e	+	1	TP
K_pneumoniae_SB611	SUCT	EX_succ_e	+	1	TP
K_pneumoniae_SB611	dMNE	EX_man_e	+	1	TP
K_pneumoniae_SB611	CIT	EX_cit_e	+	1	TP
K_pneumoniae_SB611	dCEL	EX_cellb_e	+	1	TP
K_pneumoniae_SB611	dSOR	EX_sbt__D_e	+	1	TP
K_pneumoniae_SB611	5KG	EX_5dglcn_e	-	0	TN
K_pneumoniae_SB612	SAC	EX_sucr_e	+	1	TP
K_pneumoniae_SB612	ADO	EX_rbt_e	+	1	TP
K_pneumoniae_SB612	dMAL	EX_malt_e	+	1	TP
K_pneumoniae_SB612	dTAG	EX_tag__D_e	-	0	TN
K_pneumoniae_SB612	dMAN	EX_mnl_e	+	1	TP
K_pneumoniae_SB612	PLE	EX_pala_e	+	1	TP
K_pneumoniae_SB612	dTRE	EX_tre_e	+	1	TP
K_pneumoniae_SB612	SUCT	EX_succ_e	-	1	FP
K_pneumoniae_SB612	dMNE	EX_man_e	+	1	TP
K_pneumoniae_SB612	CIT	EX_cit_e	+	1	TP
K_pneumoniae_SB612	dCEL	EX_cellb_e	+	1	TP
K_pneumoniae_SB612	dSOR	EX_sbt__D_e	+	1	TP
K_pneumoniae_SB612	5KG	EX_5dglcn_e	-	0	TN
K_pneumoniae_SB615	SAC	EX_sucr_e	+	1	TP
K_pneumoniae_SB615	ADO	EX_rbt_e	+	1	TP
K_pneumoniae_SB615	dMAL	EX_malt_e	+	1	TP
K_pneumoniae_SB615	dTAG	EX_tag__D_e	-	0	TN
K_pneumoniae_SB615	dMAN	EX_mnl_e	+	1	TP
K_pneumoniae_SB615	PLE	EX_pala_e	+	1	TP
K_pneumoniae_SB615	dTRE	EX_tre_e	+	1	TP
K_pneumoniae_SB615	SUCT	EX_succ_e	+	1	TP
K_pneumoniae_SB615	dMNE	EX_man_e	+	1	TP
K_pneumoniae_SB615	CIT	EX_cit_e	+	1	TP
K_pneumoniae_SB615	dCEL	EX_cellb_e	+	1	TP
K_pneumoniae_SB615	dSOR	EX_sbt__D_e	+	1	TP
K_pneumoniae_SB615	5KG	EX_5dglcn_e	-	0	TN
K_pneumoniae_SB617	SAC	EX_sucr_e	+	1	TP
K_pneumoniae_SB617	ADO	EX_rbt_e	+	1	TP
K_pneumoniae_SB617	dMAL	EX_malt_e	+	1	TP
K_pneumoniae_SB617	dTAG	EX_tag__D_e	-	0	TN
K_pneumoniae_SB617	dMAN	EX_mnl_e	+	1	TP
K_pneumoniae_SB617	PLE	EX_pala_e	+	1	TP
K_pneumoniae_SB617	dTRE	EX_tre_e	+	1	TP
K_pneumoniae_SB617	SUCT	EX_succ_e	+	1	TP
K_pneumoniae_SB617	dMNE	EX_man_e	+	1	TP
K_pneumoniae_SB617	CIT	EX_cit_e	+	1	TP
K_pneumoniae_SB617	dCEL	EX_cellb_e	+	1	TP
K_pneumoniae_SB617	dSOR	EX_sbt__D_e	+	1	TP
K_pneumoniae_SB617	5KG	EX_5dglcn_e	-	0	TN
K_variicola_tropicalensis_CDC4241-71	SAC	EX_sucr_e	+	1	TP
K_variicola_tropicalensis_CDC4241-71	ADO	EX_rbt_e	-	0	TN
K_variicola_tropicalensis_CDC4241-71	dMAL	EX_malt_e	+	1	TP
K_variicola_tropicalensis_CDC4241-71	dTAG	EX_tag__D_e	+	1	TP
K_variicola_tropicalensis_CDC4241-71	dMAN	EX_mnl_e	+	1	TP
K_variicola_tropicalensis_CDC4241-71	PLE	EX_pala_e	+	1	TP
K_variicola_tropicalensis_CDC4241-71	dTRE	EX_tre_e	+	1	TP
K_variicola_tropicalensis_CDC4241-71	SUCT	EX_succ_e	+	1	TP
K_variicola_tropicalensis_CDC4241-71	dMNE	EX_man_e	+	1	TP
K_variicola_tropicalensis_CDC4241-71	CIT	EX_cit_e	+	1	TP
K_variicola_tropicalensis_CDC4241-71	dCEL	EX_cellb_e	+	1	TP
K_variicola_tropicalensis_CDC4241-71	dSOR	EX_sbt__D_e	+	1	TP
K_variicola_tropicalensis_CDC4241-71	5KG	EX_5dglcn_e	+	1	TP
K_quasi_quasi_SB98	SAC	EX_sucr_e	+	1	TP
K_quasi_quasi_SB98	ADO	EX_rbt_e	+	1	TP
K_quasi_quasi_SB98	dMAL	EX_malt_e	+	1	TP
K_quasi_quasi_SB98	dTAG	EX_tag__D_e	-	0	TN
K_quasi_quasi_SB98	dMAN	EX_mnl_e	+	1	TP
K_quasi_quasi_SB98	PLE	EX_pala_e	+	1	TP
K_quasi_quasi_SB98	dTRE	EX_tre_e	+	1	TP
K_quasi_quasi_SB98	SUCT	EX_succ_e	+	1	TP
K_quasi_quasi_SB98	dMNE	EX_man_e	+	1	TP
K_quasi_quasi_SB98	CIT	EX_cit_e	+	1	TP
K_quasi_quasi_SB98	dCEL	EX_cellb_e	+	1	TP
K_quasi_quasi_SB98	dSOR	EX_sbt__D_e	+	1	TP
K_quasi_quasi_SB98	5KG	EX_5dglcn_e	+	1	TP
