# Supplementary material for: A curated collection of Klebsiella metabolic models reveals variable substrate usage and gene essentiality
Source: Genome Res. 2022 May;32(5):1004–14. doi: 10.1101/gr.276289.121 (PMC9104693; doi:10.1101/gr.276289.121)
Supplement: Supplemental Material [file supp_gr.276289.121_Supplemental_Table_S7.xlsx]

## Sheet: Supplemental_Table_S7
Supplemental Table 7: Genes predicted to be essential for growth on all core carbon substrates for all strains.
Gene ID	Reaction ID	Reaction	SEED subsystem	Grouped subsystem (as listed in text and figs)
KPN_01091	3OAR60	3ohexACP_c + h_c + nadph_c <=> 3hhexACP_c + nadp_c	Cell Envelope Biosynthesis	Cell Membrane Metabolism
KPN_01091	3OAR120	3oddecACP_c + h_c + nadph_c <=> 3hddecACP_c + nadp_c	Cell Envelope Biosynthesis	Cell Membrane Metabolism
KPN_01091	3OAR100	3odecACP_c + h_c + nadph_c <=> 3hdecACP_c + nadp_c	Cell Envelope Biosynthesis	Cell Membrane Metabolism
KPN_01091	3OAR40	actACP_c + h_c + nadph_c <=> 3haACP_c + nadp_c	Cell Envelope Biosynthesis	Cell Membrane Metabolism
KPN_01091	3OAR181	3ocvac11eACP_c + h_c + nadph_c --> 3hcvac11eACP_c + nadp_c	Cell Envelope Biosynthesis	Cell Membrane Metabolism
KPN_01091	3OAR180	3ooctdACP_c + h_c + nadph_c <=> 3hoctaACP_c + nadp_c	Cell Envelope Biosynthesis	Cell Membrane Metabolism
KPN_01091	3OAR161	3ocpalm9eACP_c + h_c + nadph_c --> 3hcpalm9eACP_c + nadp_c	Cell Envelope Biosynthesis	Cell Membrane Metabolism
KPN_01091	3OAR80	3ooctACP_c + h_c + nadph_c <=> 3hoctACP_c + nadp_c	Cell Envelope Biosynthesis	Cell Membrane Metabolism
KPN_01091	3OAR160	3opalmACP_c + h_c + nadph_c <=> 3hpalmACP_c + nadp_c	Cell Envelope Biosynthesis	Cell Membrane Metabolism
KPN_01091	3OAR141	3ocmrs7eACP_c + h_c + nadph_c --> 3hcmrs7eACP_c + nadp_c	Cell Envelope Biosynthesis	Cell Membrane Metabolism
KPN_01091	3OAR140	3omrsACP_c + h_c + nadph_c <=> 3hmrsACP_c + nadp_c	Cell Envelope Biosynthesis	Cell Membrane Metabolism
KPN_01091	3OAR121	3ocddec5eACP_c + h_c + nadph_c --> 3hcddec5eACP_c + nadp_c	Cell Envelope Biosynthesis	Cell Membrane Metabolism
KPN_01092	ACOATA	ACP_c + accoa_c <=> acACP_c + coa_c	Membrane Lipid Metabolism	Cell Membrane Metabolism
KPN_01092	AACPS5	ACP_c + atp_c + ocdcea_c --> amp_c + octeACP_c + ppi_c	Cell Envelope Biosynthesis	Cell Membrane Metabolism
KPN_01092	AACPS2	ACP_c + atp_c + ttdcea_c --> amp_c + ppi_c + tdeACP_c	Cell Envelope Biosynthesis	Cell Membrane Metabolism
KPN_01092	AACPS8	ACP_c + atp_c + dca_c --> amp_c + dcaACP_c + ppi_c	Cell Envelope Biosynthesis	Cell Membrane Metabolism
KPN_01092	AACPS3	ACP_c + atp_c + hdca_c --> amp_c + palmACP_c + ppi_c	Cell Envelope Biosynthesis	Cell Membrane Metabolism
KPN_01092	AACPS6	ACP_c + atp_c + ocdca_c --> amp_c + ocdcaACP_c + ppi_c	Cell Envelope Biosynthesis	Cell Membrane Metabolism
KPN_01092	AACPS9	ACP_c + atp_c + octa_c --> amp_c + ocACP_c + ppi_c	Cell Envelope Biosynthesis	Cell Membrane Metabolism
KPN_01092	AACPS4	ACP_c + atp_c + hdcea_c --> amp_c + hdeACP_c + ppi_c	Cell Envelope Biosynthesis	Cell Membrane Metabolism
KPN_01092	AACPS7	ACP_c + atp_c + ddca_c --> amp_c + ddcaACP_c + ppi_c	Cell Envelope Biosynthesis	Cell Membrane Metabolism
KPN_01092	MCOATA	ACP_c + malcoa_c <=> coa_c + malACP_c	Membrane Lipid Metabolism	Cell Membrane Metabolism
KPN_01092	AACPS1	ACP_c + atp_c + ttdca_c --> amp_c + myrsACP_c + ppi_c	Cell Envelope Biosynthesis	Cell Membrane Metabolism
KPN_03664	ACCOAC	accoa_c + atp_c + hco3_c --> adp_c + h_c + malcoa_c + pi_c	Membrane Lipid Metabolism	Cell Membrane Metabolism
KPN_03665	ACCOAC	accoa_c + atp_c + hco3_c --> adp_c + h_c + malcoa_c + pi_c	Membrane Lipid Metabolism	Cell Membrane Metabolism
KPN_00198	ACCOAC	accoa_c + atp_c + hco3_c --> adp_c + h_c + malcoa_c + pi_c	Membrane Lipid Metabolism	Cell Membrane Metabolism
KPN_02706	ACCOAC	accoa_c + atp_c + hco3_c --> adp_c + h_c + malcoa_c + pi_c	Membrane Lipid Metabolism	Cell Membrane Metabolism
KPN_03963	AGMHE	adphep_DD_c --> adphep_LD_c	Lipopolysaccharide Biosynthesis / Recycling	Cell Membrane Metabolism
KPN_03436	AGPAT120	1ddecg3p_c + ddcaACP_c --> ACP_c + pa120_c	Glycerophospholipid Metabolism	Lipid Metabolism
KPN_03436	AGPAT181	1odec11eg3p_c + octeACP_c --> ACP_c + pa181_c	Glycerophospholipid Metabolism	Lipid Metabolism
KPN_03436	AGPAT140	1tdecg3p_c + myrsACP_c --> ACP_c + pa140_c	Glycerophospholipid Metabolism	Lipid Metabolism
KPN_03436	AGPAT141	1tdec7eg3p_c + tdeACP_c --> ACP_c + pa141_c	Glycerophospholipid Metabolism	Lipid Metabolism
KPN_03436	AGPAT160	1hdecg3p_c + palmACP_c --> ACP_c + pa160_c	Glycerophospholipid Metabolism	Lipid Metabolism
KPN_03436	AGPAT161	1hdec9eg3p_c + hdeACP_c --> ACP_c + pa161_c	Glycerophospholipid Metabolism	Lipid Metabolism
KPN_03436	AGPAT180	1odecg3p_c + ocdcaACP_c --> ACP_c + pa180_c	Glycerophospholipid Metabolism	Lipid Metabolism
KPN_04388	IMPC	h2o_c + imp_c <=> fprica_c	Purine and Pyrimidine Biosynthesis	Nucleotide Metabolism
KPN_04388	AICART	10fthf_c + aicar_c <=> fprica_c + thf_c	Purine and Pyrimidine Biosynthesis	Nucleotide Metabolism
KPN_01256	ANPRT	anth_c + prpp_c --> ppi_c + pran_c	Tyrosine, Tryptophan, and Phenylalanine Metabolism	Amino Acid Metabolism
KPN_01256	ANS	chor_c + gln__L_c --> anth_c + glu__L_c + h_c + pyr_c	Tyrosine, Tryptophan, and Phenylalanine Metabolism	Amino Acid Metabolism
KPN_01257	ANS	chor_c + gln__L_c --> anth_c + glu__L_c + h_c + pyr_c	Tyrosine, Tryptophan, and Phenylalanine Metabolism	Amino Acid Metabolism
KPN_03799	ASAD	aspsa_c + nadp_c + pi_c <=> 4pasp_c + h_c + nadph_c	Threonine and Lysine Metabolism	Amino Acid Metabolism
KPN_03453	CD2tpp	cd2_p --> cd2_c	Inorganic Ion Transport and Metabolism	Transport, Outer
KPN_03453	ZN2tpp	zn2_p --> zn2_c	Inorganic Ion Transport and Metabolism	Transport, Outer
KPN_03453	GMHEPK	atp_c + gmhep7p_c --> adp_c + gmhep17bp_c + h_c	Lipopolysaccharide Biosynthesis / Recycling	Cell Membrane Metabolism
KPN_03453	FE2tpp	fe2_p --> fe2_c	Inorganic Ion Transport and Metabolism	Transport, Outer
KPN_03453	CU2tpp	cu2_p --> cu2_c	Inorganic Ion Transport and Metabolism	Transport, Outer
KPN_03453	COBALT2tpp	cobalt2_p --> cobalt2_c	Inorganic Ion Transport and Metabolism	Transport, Outer
KPN_03453	MN2tpp	mn2_p --> mn2_c	Inorganic Ion Transport and Metabolism	Transport, Outer
KPN_03453	GMHEPAT	atp_c + gmhep1p_c + h_c --> adphep_DD_c + ppi_c	Lipopolysaccharide Biosynthesis / Recycling	Cell Membrane Metabolism
KPN_02922	CHORM	chor_c --> pphn_c	Tyrosine, Tryptophan, and Phenylalanine Metabolism	Amino Acid Metabolism
KPN_02922	PPND	nad_c + pphn_c --> 34hpp_c + co2_c + nadh_c	Tyrosine, Tryptophan, and Phenylalanine Metabolism	Amino Acid Metabolism
KPN_02719	CHORS	3psme_c --> chor_c + pi_c	Tyrosine, Tryptophan, and Phenylalanine Metabolism	Amino Acid Metabolism
KPN_00941	PE160abcpp	atp_c + h2o_c + pe160_c --> adp_c + h_c + pe160_p + pi_c	Transport, Inner Membrane	Transport, Inner
KPN_00941	PA160abcpp	atp_c + h2o_c + pa160_c --> adp_c + h_c + pa160_p + pi_c	Transport, Inner Membrane	Transport, Inner
KPN_00941	PG120abcpp	atp_c + h2o_c + pg120_c --> adp_c + h_c + pg120_p + pi_c	Transport, Inner Membrane	Transport, Inner
KPN_00941	LIPACabcpp	atp_c + h2o_c + lipa_cold_c --> adp_c + h_c + lipa_cold_p + pi_c	Lipopolysaccharide Biosynthesis / Recycling	Cell Membrane Metabolism
KPN_00941	PGP181abcpp	atp_c + h2o_c + pgp181_c --> adp_c + h_c + pgp181_p + pi_c	Transport, Inner Membrane	Transport, Inner
KPN_00941	PE140abcpp	atp_c + h2o_c + pe140_c --> adp_c + h_c + pe140_p + pi_c	Transport, Inner Membrane	Transport, Inner
KPN_00941	PG181abcpp	atp_c + h2o_c + pg181_c --> adp_c + h_c + pg181_p + pi_c	Transport, Inner Membrane	Transport, Inner
KPN_00941	LIPAabcpp	atp_c + h2o_c + lipa_c --> adp_c + h_c + lipa_p + pi_c	Lipopolysaccharide Biosynthesis / Recycling	Cell Membrane Metabolism
KPN_00941	PE161abcpp	atp_c + h2o_c + pe161_c --> adp_c + h_c + pe161_p + pi_c	Transport, Inner Membrane	Transport, Inner
KPN_00941	PG160abcpp	atp_c + h2o_c + pg160_c --> adp_c + h_c + pg160_p + pi_c	Transport, Inner Membrane	Transport, Inner
KPN_00941	PA120abcpp	atp_c + h2o_c + pa120_c --> adp_c + h_c + pa120_p + pi_c	Transport, Inner Membrane	Transport, Inner
KPN_00941	PA161abcpp	atp_c + h2o_c + pa161_c --> adp_c + h_c + pa161_p + pi_c	Transport, Inner Membrane	Transport, Inner
KPN_00941	PGP160abcpp	atp_c + h2o_c + pgp160_c --> adp_c + h_c + pgp160_p + pi_c	Transport, Inner Membrane	Transport, Inner
KPN_00941	K2L4Aabcpp	atp_c + h2o_c + kdo2lipid4_c --> adp_c + h_c + kdo2lipid4_p + pi_c	Transport, Inner Membrane	Transport, Inner
KPN_00941	PE180abcpp	atp_c + h2o_c + pe180_c --> adp_c + h_c + pe180_p + pi_c	Transport, Inner Membrane	Transport, Inner
KPN_00941	PA180abcpp	atp_c + h2o_c + pa180_c --> adp_c + h_c + pa180_p + pi_c	Transport, Inner Membrane	Transport, Inner
KPN_00941	PE141abcpp	atp_c + h2o_c + pe141_c --> adp_c + h_c + pe141_p + pi_c	Transport, Inner Membrane	Transport, Inner
KPN_00941	COLIPAabcpp	atp_c + colipa_c + h2o_c --> adp_c + colipa_p + h_c + pi_c	Lipopolysaccharide Biosynthesis / Recycling	Cell Membrane Metabolism
KPN_00941	PGP161abcpp	atp_c + h2o_c + pgp161_c --> adp_c + h_c + pgp161_p + pi_c	Transport, Inner Membrane	Transport, Inner
KPN_00941	PG161abcpp	atp_c + h2o_c + pg161_c --> adp_c + h_c + pg161_p + pi_c	Transport, Inner Membrane	Transport, Inner
KPN_00941	PA140abcpp	atp_c + h2o_c + pa140_c --> adp_c + h_c + pa140_p + pi_c	Transport, Inner Membrane	Transport, Inner
KPN_00941	PG140abcpp	atp_c + h2o_c + pg140_c --> adp_c + h_c + pg140_p + pi_c	Transport, Inner Membrane	Transport, Inner
KPN_00941	PE120abcpp	atp_c + h2o_c + pe120_c --> adp_c + h_c + pe120_p + pi_c	Transport, Inner Membrane	Transport, Inner
KPN_00941	PE181abcpp	atp_c + h2o_c + pe181_c --> adp_c + h_c + pe181_p + pi_c	Transport, Inner Membrane	Transport, Inner
KPN_00941	PA181abcpp	atp_c + h2o_c + pa181_c --> adp_c + h_c + pa181_p + pi_c	Transport, Inner Membrane	Transport, Inner
KPN_00941	PA141abcpp	atp_c + h2o_c + pa141_c --> adp_c + h_c + pa141_p + pi_c	Transport, Inner Membrane	Transport, Inner
KPN_00941	PGP120abcpp	atp_c + h2o_c + pgp120_c --> adp_c + h_c + pgp120_p + pi_c	Transport, Inner Membrane	Transport, Inner
KPN_00941	PGP180abcpp	atp_c + h2o_c + pgp180_c --> adp_c + h_c + pgp180_p + pi_c	Transport, Inner Membrane	Transport, Inner
KPN_00941	PG180abcpp	atp_c + h2o_c + pg180_c --> adp_c + h_c + pg180_p + pi_c	Transport, Inner Membrane	Transport, Inner
KPN_00941	PG141abcpp	atp_c + h2o_c + pg141_c --> adp_c + h_c + pg141_p + pi_c	Transport, Inner Membrane	Transport, Inner
KPN_00941	PGP140abcpp	atp_c + h2o_c + pgp140_c --> adp_c + h_c + pgp140_p + pi_c	Transport, Inner Membrane	Transport, Inner
KPN_00941	PGP141abcpp	atp_c + h2o_c + pgp141_c --> adp_c + h_c + pgp141_p + pi_c	Transport, Inner Membrane	Transport, Inner
KPN_03252	DAPDC	26dap__M_c + h_c --> co2_c + lys__L_c	Threonine and Lysine Metabolism	Amino Acid Metabolism
KPN_00188	DASYN140	ctp_c + h_c + pa140_c --> cdpdtdecg_c + ppi_c	Glycerophospholipid Metabolism	Lipid Metabolism
KPN_00188	DASYN160	ctp_c + h_c + pa160_c --> cdpdhdecg_c + ppi_c	Glycerophospholipid Metabolism	Lipid Metabolism
KPN_00188	DASYN180	ctp_c + h_c + pa180_c --> cdpdodecg_c + ppi_c	Glycerophospholipid Metabolism	Lipid Metabolism
KPN_00188	DASYN141	ctp_c + h_c + pa141_c --> cdpdtdec7eg_c + ppi_c	Glycerophospholipid Metabolism	Lipid Metabolism
KPN_00188	DASYN120	ctp_c + h_c + pa120_c --> cdpdddecg_c + ppi_c	Glycerophospholipid Metabolism	Lipid Metabolism
KPN_00188	DASYN161	ctp_c + h_c + pa161_c --> cdpdhdec9eg_c + ppi_c	Glycerophospholipid Metabolism	Lipid Metabolism
KPN_00188	DASYN181	ctp_c + h_c + pa181_c --> cdpdodec11eg_c + ppi_c	Glycerophospholipid Metabolism	Lipid Metabolism
KPN_03996	GK1	atp_c + gmp_c <=> adp_c + gdp_c	Nucleotide Salvage Pathway	Nucleotide Metabolism
KPN_03996	DGK1	atp_c + dgmp_c <=> adp_c + dgdp_c	Nucleotide Salvage Pathway	Nucleotide Metabolism
KPN_04270	DHAD2	23dhmp_c --> 3mop_c + h2o_c	Valine, Leucine, and Isoleucine Metabolism	Amino Acid Metabolism
KPN_04270	DHAD1	23dhmb_c --> 3mob_c + h2o_c	Valine, Leucine, and Isoleucine Metabolism	Amino Acid Metabolism
KPN_04273	KARA2	2ahbut_c + h_c + nadph_c <=> 23dhmp_c + nadp_c	Valine, Leucine, and Isoleucine Metabolism	Amino Acid Metabolism
KPN_04273	DPR	2dhp_c + h_c + nadph_c --> nadp_c + pant__R_c	Cofactor and Prosthetic Group Biosynthesis	Cofactor and Prosthetic Group Biosynthesis
KPN_04273	KARA1	23dhmb_c + nadp_c <=> alac__S_c + h_c + nadph_c	Valine, Leucine, and Isoleucine Metabolism	Amino Acid Metabolism
KPN_01096	DTMPK	atp_c + dtmp_c <=> adp_c + dtdp_c	Nucleotide Salvage Pathway	Nucleotide Metabolism
KPN_01284	EAR141x	h_c + nadh_c + t3c7mrseACP_c --> nad_c + tdeACP_c	Cell Envelope Biosynthesis	Cell Membrane Metabolism
KPN_01284	EAR120y	h_c + nadph_c + tddec2eACP_c --> ddcaACP_c + nadp_c	Cell Envelope Biosynthesis	Cell Membrane Metabolism
KPN_01284	EAR60y	h_c + nadph_c + thex2eACP_c --> hexACP_c + nadp_c	Cell Envelope Biosynthesis	Cell Membrane Metabolism
KPN_01284	EAR181x	h_c + nadh_c + t3c11vaceACP_c --> nad_c + octeACP_c	Cell Envelope Biosynthesis	Cell Membrane Metabolism
KPN_01284	EAR160y	h_c + nadph_c + tpalm2eACP_c --> nadp_c + palmACP_c	Cell Envelope Biosynthesis	Cell Membrane Metabolism
KPN_01284	EAR100x	h_c + nadh_c + tdec2eACP_c --> dcaACP_c + nad_c	Cell Envelope Biosynthesis	Cell Membrane Metabolism
KPN_01284	EAR140x	h_c + nadh_c + tmrs2eACP_c --> myrsACP_c + nad_c	Cell Envelope Biosynthesis	Cell Membrane Metabolism
KPN_01284	EAR40y	but2eACP_c + h_c + nadph_c --> butACP_c + nadp_c	Cell Envelope Biosynthesis	Cell Membrane Metabolism
KPN_01284	EAR180x	h_c + nadh_c + toctd2eACP_c --> nad_c + ocdcaACP_c	Cell Envelope Biosynthesis	Cell Membrane Metabolism
KPN_01284	EAR141y	h_c + nadph_c + t3c7mrseACP_c --> nadp_c + tdeACP_c	Cell Envelope Biosynthesis	Cell Membrane Metabolism
KPN_01284	EAR121x	h_c + nadh_c + t3c5ddeceACP_c --> cddec5eACP_c + nad_c	Cell Envelope Biosynthesis	Cell Membrane Metabolism
KPN_01284	EAR80x	h_c + nadh_c + toct2eACP_c --> nad_c + ocACP_c	Cell Envelope Biosynthesis	Cell Membrane Metabolism
KPN_01284	EAR181y	h_c + nadph_c + t3c11vaceACP_c --> nadp_c + octeACP_c	Cell Envelope Biosynthesis	Cell Membrane Metabolism
KPN_01284	EAR161x	h_c + nadh_c + t3c9palmeACP_c --> hdeACP_c + nad_c	Cell Envelope Biosynthesis	Cell Membrane Metabolism
KPN_01284	EAR140y	h_c + nadph_c + tmrs2eACP_c --> myrsACP_c + nadp_c	Cell Envelope Biosynthesis	Cell Membrane Metabolism
KPN_01284	EAR120x	h_c + nadh_c + tddec2eACP_c --> ddcaACP_c + nad_c	Cell Envelope Biosynthesis	Cell Membrane Metabolism
KPN_01284	EAR60x	h_c + nadh_c + thex2eACP_c --> hexACP_c + nad_c	Cell Envelope Biosynthesis	Cell Membrane Metabolism
KPN_01284	EAR180y	h_c + nadph_c + toctd2eACP_c --> nadp_c + ocdcaACP_c	Cell Envelope Biosynthesis	Cell Membrane Metabolism
KPN_01284	EAR160x	h_c + nadh_c + tpalm2eACP_c --> nad_c + palmACP_c	Cell Envelope Biosynthesis	Cell Membrane Metabolism
KPN_01284	EAR121y	h_c + nadph_c + t3c5ddeceACP_c --> cddec5eACP_c + nadp_c	Cell Envelope Biosynthesis	Cell Membrane Metabolism
KPN_01284	EAR80y	h_c + nadph_c + toct2eACP_c --> nadp_c + ocACP_c	Cell Envelope Biosynthesis	Cell Membrane Metabolism
KPN_01284	EAR100y	h_c + nadph_c + tdec2eACP_c --> dcaACP_c + nadp_c	Cell Envelope Biosynthesis	Cell Membrane Metabolism
KPN_01284	EAR40x	but2eACP_c + h_c + nadh_c --> butACP_c + nad_c	Cell Envelope Biosynthesis	Cell Membrane Metabolism
KPN_01284	EAR161y	h_c + nadph_c + t3c9palmeACP_c --> hdeACP_c + nadp_c	Cell Envelope Biosynthesis	Cell Membrane Metabolism
KPN_04135	UAGDP	acgam1p_c + h_c + utp_c --> ppi_c + uacgam_c	Cell Envelope Biosynthesis	Cell Membrane Metabolism
KPN_04135	G1PACT	accoa_c + gam1p_c --> acgam1p_c + coa_c + h_c	Cell Envelope Biosynthesis	Cell Membrane Metabolism
KPN_04429	G3PAT160	glyc3p_c + palmACP_c --> 1hdecg3p_c + ACP_c	Glycerophospholipid Metabolism	Lipid Metabolism
KPN_04429	G3PAT161	glyc3p_c + hdeACP_c --> 1hdec9eg3p_c + ACP_c	Glycerophospholipid Metabolism	Lipid Metabolism
KPN_04429	G3PAT180	glyc3p_c + ocdcaACP_c --> 1odecg3p_c + ACP_c	Glycerophospholipid Metabolism	Lipid Metabolism
KPN_04429	G3PAT181	glyc3p_c + octeACP_c --> 1odec11eg3p_c + ACP_c	Glycerophospholipid Metabolism	Lipid Metabolism
KPN_04429	G3PAT120	ddcaACP_c + glyc3p_c --> 1ddecg3p_c + ACP_c	Glycerophospholipid Metabolism	Lipid Metabolism
KPN_04429	G3PAT140	glyc3p_c + myrsACP_c --> 1tdecg3p_c + ACP_c	Glycerophospholipid Metabolism	Lipid Metabolism
KPN_04429	G3PAT141	glyc3p_c + tdeACP_c --> 1tdec7eg3p_c + ACP_c	Glycerophospholipid Metabolism	Lipid Metabolism
KPN_02202	GALUi	g1p_c + h_c + utp_c --> ppi_c + udpg_c	Cell Envelope Biosynthesis	Cell Membrane Metabolism
KPN_00214	GMHEPPA	gmhep17bp_c + h2o_c --> gmhep1p_c + pi_c	Lipopolysaccharide Biosynthesis / Recycling	Cell Membrane Metabolism
KPN_04394	HSST	hom__L_c + succoa_c --> coa_c + suchms_c	Methionine Metabolism	Amino Acid Metabolism
KPN_01255	IGPS	2cpr5p_c + h_c --> 3ig3p_c + co2_c + h2o_c	Tyrosine, Tryptophan, and Phenylalanine Metabolism	Amino Acid Metabolism
KPN_01255	PRAIi	pran_c --> 2cpr5p_c	Tyrosine, Tryptophan, and Phenylalanine Metabolism	Amino Acid Metabolism
KPN_04269	PHETA1	akg_c + phe__L_c <=> glu__L_c + phpyr_c	Tyrosine, Tryptophan, and Phenylalanine Metabolism	Amino Acid Metabolism
KPN_04269	LEUTAi	4mop_c + glu__L_c --> akg_c + leu__L_c	Valine, Leucine, and Isoleucine Metabolism	Amino Acid Metabolism
KPN_04269	VALTA	akg_c + val__L_c <=> 3mob_c + glu__L_c	Valine, Leucine, and Isoleucine Metabolism	Amino Acid Metabolism
KPN_04269	ILETA	akg_c + ile__L_c <=> 3mop_c + glu__L_c	Valine, Leucine, and Isoleucine Metabolism	Amino Acid Metabolism
KPN_00079	IPMD	3c2hmp_c + nad_c --> 3c4mop_c + h_c + nadh_c	Valine, Leucine, and Isoleucine Metabolism	Amino Acid Metabolism
KPN_00079	OMCDC	3c4mop_c + h_c --> 4mop_c + co2_c	Valine, Leucine, and Isoleucine Metabolism	Amino Acid Metabolism
KPN_00077	IPPMIa	3c2hmp_c <=> 2ippm_c + h2o_c	Valine, Leucine, and Isoleucine Metabolism	Amino Acid Metabolism
KPN_00077	IPPMIb	2ippm_c + h2o_c <=> 3c3hmp_c	Valine, Leucine, and Isoleucine Metabolism	Amino Acid Metabolism
KPN_00078	IPPMIa	3c2hmp_c <=> 2ippm_c + h2o_c	Valine, Leucine, and Isoleucine Metabolism	Amino Acid Metabolism
KPN_00078	IPPMIb	2ippm_c + h2o_c <=> 3c3hmp_c	Valine, Leucine, and Isoleucine Metabolism	Amino Acid Metabolism
KPN_03608	KDOPP	h2o_c + kdo8p_c --> kdo_c + pi_c	Lipopolysaccharide Biosynthesis / Recycling	Cell Membrane Metabolism
KPN_02230	KDOPS	ara5p_c + h2o_c + pep_c --> kdo8p_c + pi_c	Lipopolysaccharide Biosynthesis / Recycling	Cell Membrane Metabolism
KPN_00195	LPADSS	lipidX_c + u23ga_c --> h_c + lipidAds_c + udp_c	Lipopolysaccharide Biosynthesis / Recycling	Cell Membrane Metabolism
KPN_01515	MAN6PI	man6p_c <=> f6p_c	Alternate Carbon Metabolism	Carbohydrate Metabolism
KPN_01090	MCOATA	ACP_c + malcoa_c <=> coa_c + malACP_c	Membrane Lipid Metabolism	Cell Membrane Metabolism
KPN_00091	PAPPT3	udcpp_c + ugmda_c --> uagmda_c + ump_c	Cell Envelope Biosynthesis	Cell Membrane Metabolism
KPN_03586	PGAMT	gam1p_c <=> gam6p_c	Cell Envelope Biosynthesis	Cell Membrane Metabolism
KPN_02410	PGSA181	cdpdodec11eg_c + glyc3p_c --> cmp_c + h_c + pgp181_c	Glycerophospholipid Metabolism	Lipid Metabolism
KPN_02410	PGSA160	cdpdhdecg_c + glyc3p_c --> cmp_c + h_c + pgp160_c	Glycerophospholipid Metabolism	Lipid Metabolism
KPN_02410	PGSA180	cdpdodecg_c + glyc3p_c --> cmp_c + h_c + pgp180_c	Glycerophospholipid Metabolism	Lipid Metabolism
KPN_02410	PGSA141	cdpdtdec7eg_c + glyc3p_c --> cmp_c + h_c + pgp141_c	Glycerophospholipid Metabolism	Lipid Metabolism
KPN_02410	PGSA120	cdpdddecg_c + glyc3p_c --> cmp_c + h_c + pgp120_c	Glycerophospholipid Metabolism	Lipid Metabolism
KPN_02410	PGSA161	cdpdhdec9eg_c + glyc3p_c --> cmp_c + h_c + pgp161_c	Glycerophospholipid Metabolism	Lipid Metabolism
KPN_02410	PGSA140	cdpdtdecg_c + glyc3p_c --> cmp_c + h_c + pgp140_c	Glycerophospholipid Metabolism	Lipid Metabolism
KPN_00936	PSCVT	pep_c + skm5p_c <=> 3psme_c + pi_c	Tyrosine, Tryptophan, and Phenylalanine Metabolism	Amino Acid Metabolism
KPN_04557	PSD161	h_c + ps161_c --> co2_c + pe161_c	Glycerophospholipid Metabolism	Lipid Metabolism
KPN_04557	PSD140	h_c + ps140_c --> co2_c + pe140_c	Glycerophospholipid Metabolism	Lipid Metabolism
KPN_04557	PSD160	h_c + ps160_c --> co2_c + pe160_c	Glycerophospholipid Metabolism	Lipid Metabolism
KPN_04557	PSD180	h_c + ps180_c --> co2_c + pe180_c	Glycerophospholipid Metabolism	Lipid Metabolism
KPN_04557	PSD141	h_c + ps141_c --> co2_c + pe141_c	Glycerophospholipid Metabolism	Lipid Metabolism
KPN_04557	PSD181	h_c + ps181_c --> co2_c + pe181_c	Glycerophospholipid Metabolism	Lipid Metabolism
KPN_04557	PSD120	h_c + ps120_c --> co2_c + pe120_c	Glycerophospholipid Metabolism	Lipid Metabolism
KPN_02908	PSSA120	cdpdddecg_c + ser__L_c --> cmp_c + h_c + ps120_c	Glycerophospholipid Metabolism	Lipid Metabolism
KPN_02908	PSSA161	cdpdhdec9eg_c + ser__L_c --> cmp_c + h_c + ps161_c	Glycerophospholipid Metabolism	Lipid Metabolism
KPN_02908	PSSA141	cdpdtdec7eg_c + ser__L_c --> cmp_c + h_c + ps141_c	Glycerophospholipid Metabolism	Lipid Metabolism
KPN_02908	PSSA181	cdpdodec11eg_c + ser__L_c --> cmp_c + h_c + ps181_c	Glycerophospholipid Metabolism	Lipid Metabolism
KPN_02908	PSSA160	cdpdhdecg_c + ser__L_c --> cmp_c + h_c + ps160_c	Glycerophospholipid Metabolism	Lipid Metabolism
KPN_02908	PSSA180	cdpdodecg_c + ser__L_c --> cmp_c + h_c + ps180_c	Glycerophospholipid Metabolism	Lipid Metabolism
KPN_02908	PSSA140	cdpdtdecg_c + ser__L_c --> cmp_c + h_c + ps140_c	Glycerophospholipid Metabolism	Lipid Metabolism
KPN_00236	S7PI	s7p_c --> gmhep7p_c	Lipopolysaccharide Biosynthesis / Recycling	Cell Membrane Metabolism
KPN_04233	SHSL1	cys__L_c + suchms_c --> cyst__L_c + h_c + succ_c	Methionine Metabolism	Amino Acid Metabolism
KPN_00942	TDSK	atp_c + lipidAds_c --> adp_c + h_c + lipidA_c	Alternate Carbon Metabolism	Carbohydrate Metabolism
KPN_01253	TRPS3	3ig3p_c --> g3p_c + indole_c	Tyrosine, Tryptophan, and Phenylalanine Metabolism	Amino Acid Metabolism
KPN_01253	TRPS2	indole_c + ser__L_c --> h2o_c + trp__L_c	Tyrosine, Tryptophan, and Phenylalanine Metabolism	Amino Acid Metabolism
KPN_01253	TRPS1	3ig3p_c + ser__L_c --> g3p_c + h2o_c + trp__L_c	Tyrosine, Tryptophan, and Phenylalanine Metabolism	Amino Acid Metabolism
KPN_01254	TRPS3	3ig3p_c --> g3p_c + indole_c	Tyrosine, Tryptophan, and Phenylalanine Metabolism	Amino Acid Metabolism
KPN_01254	TRPS2	indole_c + ser__L_c --> h2o_c + trp__L_c	Tyrosine, Tryptophan, and Phenylalanine Metabolism	Amino Acid Metabolism
KPN_01254	TRPS1	3ig3p_c + ser__L_c --> g3p_c + h2o_c + trp__L_c	Tyrosine, Tryptophan, and Phenylalanine Metabolism	Amino Acid Metabolism
KPN_00192	U23GAAT	3hmrsACP_c + u3hga_c --> ACP_c + h_c + u23ga_c	Lipopolysaccharide Biosynthesis / Recycling	Cell Membrane Metabolism
KPN_00194	UAGAAT	3hmrsACP_c + uacgam_c <=> ACP_c + u3aga_c	Lipopolysaccharide Biosynthesis / Recycling	Cell Membrane Metabolism
KPN_03599	UAGCVT	pep_c + uacgam_c --> pi_c + uaccg_c	Cell Envelope Biosynthesis	Cell Membrane Metabolism
KPN_00094	UAGPT3	uacgam_c + uagmda_c --> h_c + uaagmda_c + udp_c	Cell Envelope Biosynthesis	Cell Membrane Metabolism
KPN_04350	UAPGR	h_c + nadph_c + uaccg_c --> nadp_c + uamr_c	Cell Envelope Biosynthesis	Cell Membrane Metabolism
KPN_00090	UGMDDS	alaala_c + atp_c + ugmd_c --> adp_c + h_c + pi_c + ugmda_c	Cell Envelope Biosynthesis	Cell Membrane Metabolism
KPN_00100	UHGADA	h2o_c + u3aga_c --> ac_c + u3hga_c	Lipopolysaccharide Biosynthesis / Recycling	Cell Membrane Metabolism
KPN_00480	USHD	h2o_c + u23ga_c --> 2.0 h_c + lipidX_c + ump_c	Lipopolysaccharide Biosynthesis / Recycling	Cell Membrane Metabolism
