# Supplementary material for: A curated collection of Klebsiella metabolic models reveals variable substrate usage and gene essentiality
Source: HighWire-hosted journal article supplement (doi:10.1101/gr.276289.121), 2022-03-11
Supplement: Supplemental_Figure_S1.pdf [file Supplemental_Figure_S1.pdf]

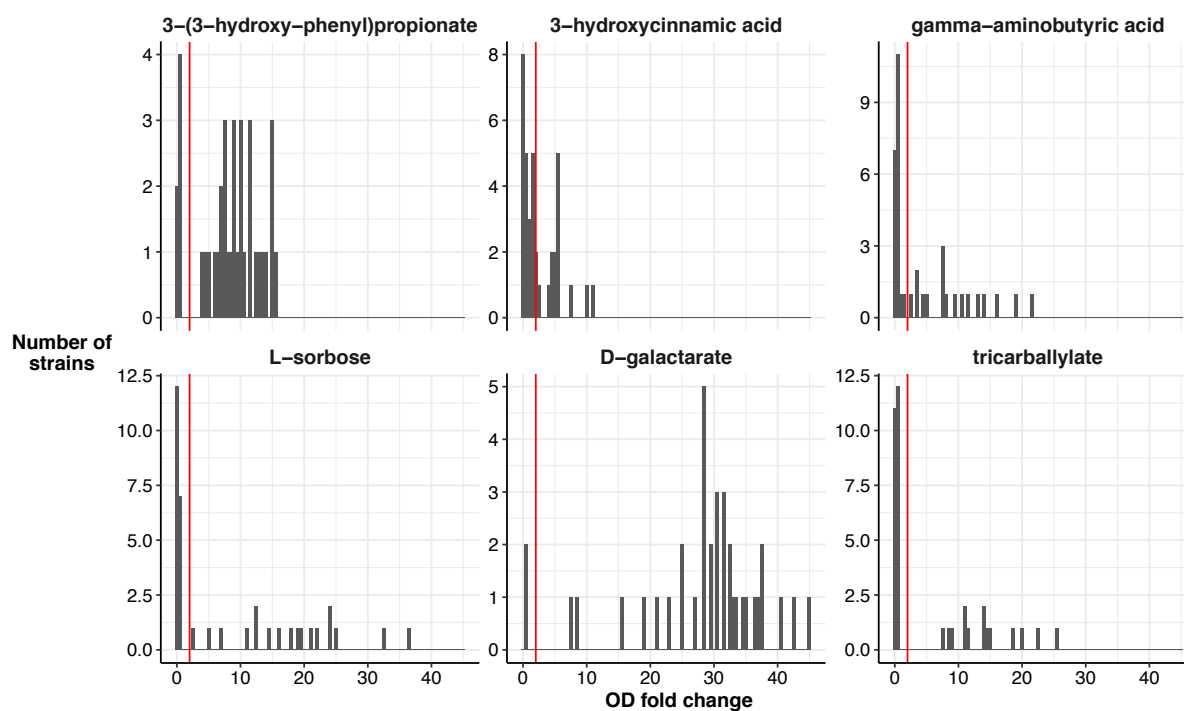

**Supplemental Figure 1: Distribution of OD fold changes for growth on six carbon substrates.** Each panel is a substrate showing total number of strains (y axis) with a particular OD fold change (x axis). Red line indicates OD fold change of 2, fold changes greater than this value were considered sufficient evidence of growth.
